# Supplementary material for: Trajectory modelling of ambulatory care sensitive conditions in Finland in 1996–2013: assessing the development of equity in primary health care through clustering of geographic areas – an observational retrospective study
Source: Springer Nature journal article supplement (doi:10.1186/s12913-019-4449-7), 2019-09-04

Additional file 2.

Mean ambulatory care sensitive condition (ACSC) rates in health centre areas (n=131) in Finland in 1996-2013.

**Men**

| Year | Vaccine-preventable | Chronic           | Acute           |
|------|---------------------|-------------------|-----------------|
|      | mean [min, max]     | mean [min, max]   | mean [min, max] |
| 1996 | 1115 [516, 2395]    | 3723 [1311, 7029] | 831 [224, 1497] |
| 1997 | 1088 [370, 2343]    | 3377 [1127, 6681] | 592 [223, 1522] |
| 1998 | 1195 [529, 3071]    | 3236 [881, 7079]  | 595 [327, 1479] |
| 1999 | 1211 [497, 3114]    | 3116 [1386, 7430] | 615 [338, 1659] |
| 2000 | 1217 [530, 3201]    | 2895 [992, 7651]  | 624 [327, 1551] |
| 2001 | 1148 [425, 3529]    | 2728 [806, 6164]  | 612 [204, 1751] |
| 2002 | 1149 [466, 4417]    | 2524 [900, 6081]  | 619 [225, 1505] |
| 2003 | 1229 [455, 2944]    | 2394 [988, 6709]  | 622 [322, 1948] |
| 2004 | 1110 [449, 2833]    | 2395 [1081, 4894] | 591 [386, 1846] |
| 2005 | 1170 [296, 2538]    | 2218 [605, 4027]  | 614 [331, 1502] |
| 2006 | 1083 [370, 2891]    | 2140 [616, 4624]  | 630 [331, 1568] |
| 2007 | 1164 [398, 2582]    | 1976 [550, 4262]  | 571 [325, 1744] |
| 2008 | 1173 [423, 2403]    | 1932 [703, 4318]  | 578 [388, 1658] |
| 2009 | 1203 [348, 2322]    | 1800 [866, 4092]  | 588 [345, 1841] |
| 2010 | 1175 [522, 2705]    | 1775 [396, 3906]  | 553 [350, 1801] |
| 2011 | 1290 [572, 3105]    | 1663 [484, 3469]  | 650 [285, 1549] |
| 2012 | 1276 [614, 3985]    | 1521 [394, 4007]  | 613 [289, 1976] |
| 2013 | 1199 [132, 2892]    | 1388 [249, 3365]  | 616 [151, 1564] |

**Women**

| Year | Vaccine-preventable | Chronic           | Acute           |
|------|---------------------|-------------------|-----------------|
|      | mean [min, max]     | mean [min, max]   | mean [min, max] |
| 1996 | 515 [128, 1402]     | 2461 [1005, 4715] | 708 [259, 1617] |
| 1997 | 525 [224, 1407]     | 2245 [763, 4585]  | 710 [200, 1534] |
| 1998 | 555 [222, 1120]     | 2156 [797, 4425]  | 709 [270, 1374] |
| 1999 | 574 [190, 1767]     | 1994 [558, 4026]  | 741 [301, 1660] |
| 2000 | 612 [153, 1383]     | 1911 [1031, 4038] | 756 [305, 1442] |
| 2001 | 562 [270, 1447]     | 1884 [813, 4836]  | 733 [237, 1623] |
| 2002 | 565 [228, 1264]     | 1713 [269, 4832]  | 734 [337, 1594] |
| 2003 | 617 [229, 1256]     | 1684 [420, 3828]  | 742 [329, 1578] |
| 2004 | 524 [97, 1106]      | 1701 [723, 4546]  | 699 [222, 1297] |
| 2005 | 586 [272, 1138]     | 1591 [439, 4186]  | 741 [259, 1435] |
| 2006 | 560 [116, 1335]     | 1525 [120, 4013]  | 725 [323, 1457] |
| 2007 | 589 [238, 1170]     | 1435 [454, 4699]  | 704 [373, 1360] |
| 2008 | 605 [273, 1318]     | 1386 [589, 3763]  | 735 [98, 1733]  |
| 2009 | 620 [206, 1709]     | 1299 [506, 2800]  | 734 [247, 1566] |
| 2010 | 617 [158, 1591]     | 1240 [515, 2752]  | 705 [314, 1557] |
| 2011 | 749 [288, 1856]     | 1164 [312, 3410]  | 771 [332, 1625] |
| 2012 | 708 [346, 1600]     | 1151 [494, 3105]  | 749 [89, 1703]  |
| 2013 | 667 [229, 2075]     | 1056 [406, 2279]  | 758 [233, 2292] |

Mean vaccine-preventable ACSC rates in men by clusters of health centre areas in 1996-2013. SW = southwestern cluster, C = central cluster, N = northern cluster

### Vaccine-preventable

| Year | SW (n=59)        | C (n=55)         | N (n=17)          |
|------|------------------|------------------|-------------------|
|      | mean [min, max]  | mean [min, max]  | mean [min, max]   |
| 1996 | 949 [516, 1660]  | 1173 [702, 2262] | 1501 [795, 2395]  |
| 1997 | 918 [370, 1360]  | 1146 [554, 1724] | 1490 [942, 2343]  |
| 1998 | 954 [529, 1660]  | 1285 [712, 2348] | 1738 [1003, 3071] |
| 1999 | 996 [497, 1843]  | 1264 [660, 2130] | 1782 [613, 3114]  |
| 2000 | 1035 [530, 2088] | 1242 [607, 1893] | 1766 [564, 3201]  |
| 2001 | 940 [425, 1545]  | 1220 [697, 2085] | 1632 [739, 3529]  |
| 2002 | 938 [466, 1594]  | 1179 [756, 1663] | 1788 [928, 4417]  |
| 2003 | 993 [455, 1623]  | 1269 [753, 2067] | 1922 [666, 2944]  |
| 2004 | 887 [449, 1567]  | 1166 [762, 1889] | 1697 [648, 2833]  |
| 2005 | 985 [296, 1616]  | 1234 [692, 2183] | 1602 [943, 2538]  |
| 2006 | 857 [370, 1371]  | 1123 [718, 1805] | 1736 [1091, 2891] |
| 2007 | 956 [398, 1520]  | 1206 [753, 1769] | 1750 [1195, 2582] |
| 2008 | 971 [423, 1655]  | 1231 [675, 2007] | 1689 [921, 2403]  |
| 2009 | 1036 [348, 1762] | 1199 [622, 1737] | 1799 [1363, 2322] |
| 2010 | 999 [522, 1628]  | 1207 [760, 1917] | 1686 [1158, 2705] |
| 2011 | 1100 [572, 1611] | 1302 [741, 2460] | 1913 [1028, 3105] |
| 2012 | 1060 [614, 1800] | 1285 [810, 1890] | 1995 [1351, 3985] |
| 2013 | 1025 [132, 2020] | 1190 [832, 1643] | 1831 [1118, 2892] |

### Chronic

| Year | SW (n=59)         | C (n=55)          | N (n=17)          |
|------|-------------------|-------------------|-------------------|
|      | mean [min, max]   | mean [min, max]   | mean [min, max]   |
| 1996 | 3031 [1311, 5018] | 4034 [2669, 5633] | 5119 [3843, 7029] |
| 1997 | 2568 [1127, 3724] | 3779 [2555, 5208] | 4886 [2757, 6681] |
| 1998 | 2427 [881, 3478]  | 3602 [2521, 5195] | 4859 [3582, 7079] |
| 1999 | 2295 [1386, 3925] | 3510 [2339, 5094] | 4691 [3593, 7430] |
| 2000 | 2133 [992, 3104]  | 3247 [2204, 4723] | 4400 [3118, 7651] |
| 2001 | 2032 [806, 3179]  | 3046 [1837, 4198] | 4118 [2214, 6164] |
| 2002 | 1868 [900, 2920]  | 2828 [1671, 3951] | 3813 [2878, 6081] |
| 2003 | 1771 [988, 2739]  | 2644 [1734, 4035] | 3747 [2094, 6709] |
| 2004 | 1830 [1081, 2641] | 2599 [1564, 3679] | 3697 [2414, 4894] |
| 2005 | 1655 [605, 2923]  | 2490 [1620, 3308] | 3292 [2427, 4027] |
| 2006 | 1646 [616, 2523]  | 2367 [1439, 3521] | 3118 [2261, 4624] |
| 2007 | 1465 [550, 2274]  | 2214 [1322, 3193] | 2982 [2211, 4262] |
| 2008 | 1425 [703, 2353]  | 2116 [1242, 3686] | 3102 [2379, 4318] |
| 2009 | 1409 [866, 2344]  | 1916 [1089, 2974] | 2784 [1868, 4092] |
| 2010 | 1315 [396, 1908]  | 2014 [1035, 3906] | 2594 [1243, 3495] |
| 2011 | 1262 [484, 1851]  | 1825 [1190, 2722] | 2535 [1799, 3469] |
| 2012 | 1162 [394, 1723]  | 1683 [664, 2678]  | 2245 [1338, 4007] |
| 2013 | 1082 [249, 1689]  | 1507 [802, 2675]  | 2067 [1211, 3365] |

**Acute**

| Year | SW (n=59)       | C (n=55)        | N (n=17)         |
|------|-----------------|-----------------|------------------|
|      | mean [min, max] | mean [min, max] | mean [min, max]  |
| 1996 | 695 [224, 1175] | 915 [492, 1497] | 1030 [589, 1490] |
| 1997 | 663 [223, 1016] | 937 [549, 1515] | 966 [453, 1522]  |
| 1998 | 763 [327, 1479] | 965 [457, 1410] | 1016 [709, 1436] |
| 1999 | 748 [338, 1296] | 962 [657, 1659] | 984 [441, 1626]  |
| 2000 | 768 [327, 1216] | 920 [525, 1551] | 1023 [721, 1388] |
| 2001 | 706 [204, 1751] | 868 [458, 1449] | 970 [507, 1734]  |
| 2002 | 720 [225, 1114] | 858 [363, 1454] | 1085 [475, 1505] |
| 2003 | 683 [413, 1027] | 839 [322, 1496] | 980 [598, 1948]  |
| 2004 | 681 [389, 1008] | 813 [386, 1160] | 1029 [400, 1846] |
| 2005 | 712 [331, 1301] | 826 [443, 1262] | 1053 [692, 1502] |
| 2006 | 641 [331, 940]  | 840 [484, 1568] | 953 [493, 1389]  |
| 2007 | 598 [325, 1037] | 815 [398, 1449] | 994 [626, 1744]  |
| 2008 | 629 [391, 1203] | 802 [388, 1198] | 1081 [641, 1658] |
| 2009 | 622 [345, 1072] | 836 [572, 1289] | 1172 [528, 1841] |
| 2010 | 596 [350, 1003] | 794 [483, 1167] | 1119 [660, 1801] |
| 2011 | 636 [285, 1226] | 828 [486, 1309] | 1079 [683, 1549] |
| 2012 | 656 [289, 1050] | 794 [318, 1326] | 1059 [601, 1976] |
| 2013 | 640 [151, 1025] | 786 [347, 1356] | 1033 [602, 1564] |

Mean vaccine-preventable ACSC rates in women by clusters of health centre areas in 1996-2013.  
 SW = southwestern cluster, C = central cluster, N = northern cluster

### Vaccine-preventable

| Year | SW (n=66)       | C (n=45)        | N (n=22)         |
|------|-----------------|-----------------|------------------|
|      | mean [min, max] | mean [min, max] | mean [min, max]  |
| 1996 | 445 [128, 740]  | 531 [361, 793]  | 712 [351, 1402]  |
| 1997 | 433 [224, 742]  | 557 [275, 970]  | 761 [276, 1407]  |
| 1998 | 455 [222, 719]  | 591 [261, 1019] | 791 [276, 1120]  |
| 1999 | 475 [190, 798]  | 595 [222, 1047] | 862 [348, 1767]  |
| 2000 | 493 [153, 839]  | 648 [396, 1027] | 907 [531, 1383]  |
| 2001 | 492 [270, 797]  | 570 [303, 867]  | 780 [284, 1447]  |
| 2002 | 458 [228, 916]  | 610 [325, 1186] | 812 [451, 1264]  |
| 2003 | 474 [229, 718]  | 674 [413, 1090] | 939 [547, 1256]  |
| 2004 | 436 [97, 710]   | 561 [97, 906]   | 720 [285, 1106]  |
| 2005 | 506 [272, 864]  | 598 [346, 1138] | 814 [405, 1138]  |
| 2006 | 450 [116, 730]  | 549 [358, 846]  | 927 [505, 1335]  |
| 2007 | 491 [238, 1067] | 595 [349, 885]  | 879 [238, 1170]  |
| 2008 | 498 [273, 790]  | 617 [398, 984]  | 919 [424, 1318]  |
| 2009 | 540 [206, 1709] | 618 [250, 965]  | 897 [458, 1709]  |
| 2010 | 522 [158, 891]  | 609 [278, 1002] | 943 [501, 1591]  |
| 2011 | 629 [288, 1002] | 770 [459, 1306] | 1099 [687, 1856] |
| 2012 | 620 [346, 1199] | 694 [380, 1027] | 1021 [545, 1600] |
| 2013 | 562 [229, 892]  | 657 [351, 1277] | 1048 [482, 2075] |

### Chronic

| Year | SW (n=66)         | C (n=45)          | N (n=22)          |
|------|-------------------|-------------------|-------------------|
|      | mean [min, max]   | mean [min, max]   | mean [min, max]   |
| 1996 | 1933 [1005, 3161] | 2705 [1936, 3756] | 3579 [2090, 4715] |
| 1997 | 1780 [763, 3309]  | 2429 [1440, 3770] | 3300 [2106, 4585] |
| 1998 | 1677 [797, 2539]  | 2329 [1678, 3360] | 3282 [1478, 4425] |
| 1999 | 1537 [558, 2346]  | 2194 [1358, 3048] | 2985 [1761, 4026] |
| 2000 | 1472 [1031, 2330] | 2137 [1625, 3326] | 2825 [1230, 4038] |
| 2001 | 1447 [813, 2391]  | 2041 [1557, 3020] | 2959 [1535, 4836] |
| 2002 | 1277 [269, 2124]  | 1882 [1121, 3066] | 2752 [1298, 4832] |
| 2003 | 1260 [420, 2055]  | 1878 [1270, 3082] | 2596 [1620, 3828] |
| 2004 | 1285 [723, 2284]  | 1895 [1009, 3035] | 2635 [1385, 4546] |
| 2005 | 1187 [439, 1947]  | 1773 [1014, 2798] | 2493 [1354, 4186] |
| 2006 | 1172 [120, 2004]  | 1660 [812, 2653]  | 2356 [1482, 4013] |
| 2007 | 1085 [454, 1869]  | 1596 [725, 2239]  | 2262 [849, 4699]  |
| 2008 | 1041 [589, 1894]  | 1533 [865, 2603]  | 2195 [1519, 3763] |
| 2009 | 1032 [506, 2052]  | 1401 [799, 2367]  | 1921 [1230, 2800] |
| 2010 | 931 [515, 1639]   | 1395 [767, 2257]  | 1888 [1168, 2752] |
| 2011 | 946 [312, 1658]   | 1266 [534, 2161]  | 1672 [793, 3410]  |
| 2012 | 921 [494, 1681]   | 1181 [650, 2042]  | 1839 [1074, 3105] |
| 2013 | 873 [406, 1440]   | 1092 [406, 2053]  | 1559 [820, 2279]  |

**Acute**

| Year | SW (n=66)       | C (n=45)        | N (n=22)         |
|------|-----------------|-----------------|------------------|
|      | mean [min, max] | mean [min, max] | mean [min, max]  |
| 1996 | 590 [259, 1000] | 789 [457, 1344] | 922 [639, 1617]  |
| 1997 | 592 [200, 919]  | 776 [525, 1136] | 946 [543, 1534]  |
| 1998 | 595 [270, 1254] | 796 [482, 1374] | 886 [270, 1374]  |
| 1999 | 615 [301, 1103] | 807 [391, 1070] | 1003 [409, 1660] |
| 2000 | 624 [305, 835]  | 814 [519, 1220] | 1045 [681, 1442] |
| 2001 | 612 [237, 1267] | 769 [423, 995]  | 1039 [785, 1623] |
| 2002 | 619 [337, 911]  | 759 [467, 1141] | 1049 [624, 1594] |
| 2003 | 622 [329, 994]  | 784 [422, 1194] | 1031 [734, 1578] |
| 2004 | 591 [222, 987]  | 741 [384, 1192] | 942 [536, 1297]  |
| 2005 | 614 [259, 918]  | 796 [544, 1324] | 1016 [612, 1435] |
| 2006 | 630 [323, 1060] | 743 [450, 1118] | 987 [557, 1457]  |
| 2007 | 571 [373, 907]  | 758 [444, 1059] | 1007 [554, 1360] |
| 2008 | 578 [98, 904]   | 774 [372, 1279] | 1142 [615, 1733] |
| 2009 | 588 [247, 926]  | 801 [517, 1254] | 1050 [636, 1566] |
| 2010 | 553 [314, 857]  | 748 [371, 1181] | 1096 [733, 1557] |
| 2011 | 650 [332, 1069] | 775 [386, 1550] | 1143 [701, 1625] |
| 2012 | 613 [89, 988]   | 750 [448, 1153] | 1167 [701, 1703] |
| 2013 | 616 [233, 1222] | 781 [338, 1198] | 1184 [723, 2292] |

Estimates (uniform line) and 95% confidence intervals (dashed line) of the trajectory model with the three clusters of health centre areas and three subgroups of ACSC in both genders.

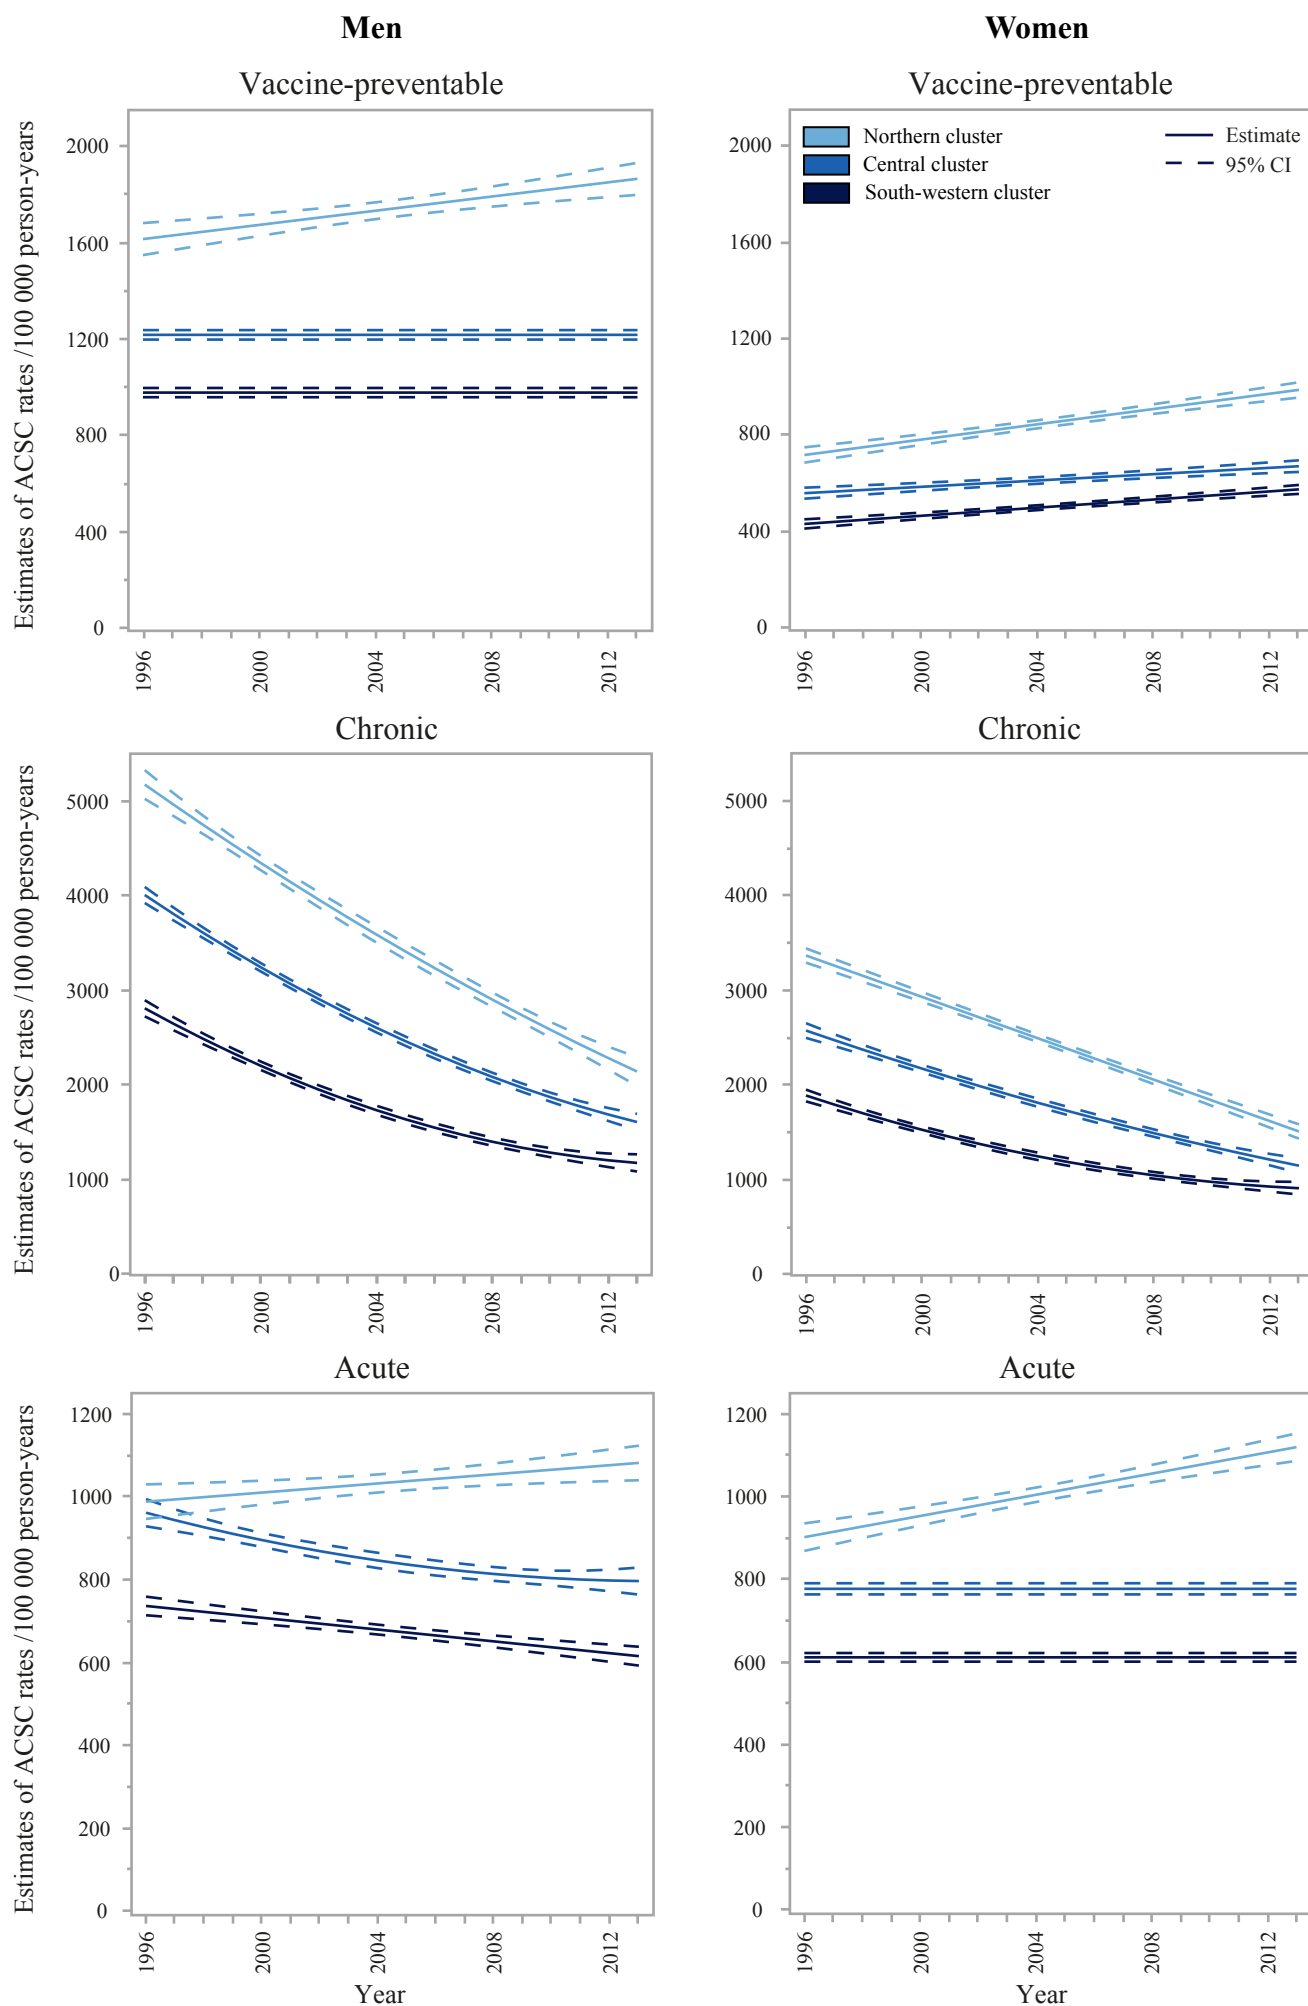

Supplement: MOESM2 [file 17138638]
